# Supplementary material for: Using 2-mSv Appendiceal CT in Usual Practice for Adolescents and Young Adults: Willingness Survey of 579 Radiologists, Emergency Physicians, and Surgeons from 20 Hospitals
Source: PubMed Central journal article supplement — Korean J Radiol. 2019 Oct 30;21(1):68–76. doi: 10.3348/kjr.2019.0010 (PMC6960317; doi:10.3348/kjr.2019.0010), 2019-10-30
Supplement: kjr-21-68-s001.pdf [file kjr-21-68-s001.pdf]

**Supplementary Table 1. Q10 Commitment to Responses**

| Commitment Level     | Overall<br>(n = 585) | Department                |                                   |                       | Title                   |                       |
|----------------------|----------------------|---------------------------|-----------------------------------|-----------------------|-------------------------|-----------------------|
|                      |                      | Radiologists<br>(n = 224) | Emergency Physicians<br>(n = 198) | Surgeons<br>(n = 163) | Attendings<br>(n = 205) | Trainees<br>(n = 380) |
| Fully committed (%)  | 434 (74.2)           | 158 (70.5)                | 158 (80)                          | 118 (72)              | 160 (78.4)              | 274 (71.9)            |
| Partly committed (%) | 145 (24.8)           | 63 (28.1)                 | 38 (19)                           | 44 (27)               | 43 (21.1)               | 102 (26.8)            |
| Unsure (%)           | 6 (1.0)              | 3 (1.3)                   | 2 (1)                             | 1 (1)                 | 2 (0.5)                 | 4 (1.3)               |
| Hardly committed (%) | 0 (0.0)              | 0 (0.0)                   | 0 (0)                             | 0 (0)                 | 0 (0.0)                 | 0 (0.0)               |
| Never committed (%)  | 0 (0.0)              | 0 (0.0)                   | 0 (0)                             | 0 (0)                 | 0 (0.0)                 | 0 (0.0)               |

Data are number of participants (and percentages). Percentages may not add up to 100% because of rounding.
