# Supplementary material for: Using 2-mSv Appendiceal CT in Usual Practice for Adolescents and Young Adults: Willingness Survey of 579 Radiologists, Emergency Physicians, and Surgeons from 20 Hospitals
Source: PubMed Central journal article supplement — Korean J Radiol. 2019 Oct 30;21(1):68–76. doi: 10.3348/kjr.2019.0010 (PMC6960317; doi:10.3348/kjr.2019.0010), 2019-10-30
Supplement: kjr-21-68-s002.pdf [file kjr-21-68-s002.pdf]

**Supplementary Table 2. Participant Job Title and Clinical Experience**

| Job Title                                         | Radiologists<br>(n = 221) | Emergency Physicians<br>(n = 196) | Surgeons<br>(n = 162) | Total<br>(n = 579) |
|---------------------------------------------------|---------------------------|-----------------------------------|-----------------------|--------------------|
| Attendings (%)                                    | 64 (29.0)                 | 68 (35)                           | 71 (44)               | 203 (35.1)         |
| Clinical experience (years [interquartile range]) | 7 (4–15)                  | 7 (4–11)                          | 7 (5–12)              | 8 (4–13)           |
| Trainees (%)                                      | 157 (71.0)                | 128 (65)                          | 91 (56)               | 376 (64.9)         |

Unless otherwise indicated, data are numbers of participants (and percentages).
