# Supplementary material for: Using 2-mSv Appendiceal CT in Usual Practice for Adolescents and Young Adults: Willingness Survey of 579 Radiologists, Emergency Physicians, and Surgeons from 20 Hospitals
Source: PubMed Central journal article supplement — Korean J Radiol. 2019 Oct 30;21(1):68–76. doi: 10.3348/kjr.2019.0010 (PMC6960317; doi:10.3348/kjr.2019.0010), 2019-10-30
Supplement: kjr-21-68-s003.pdf [file kjr-21-68-s003.pdf]

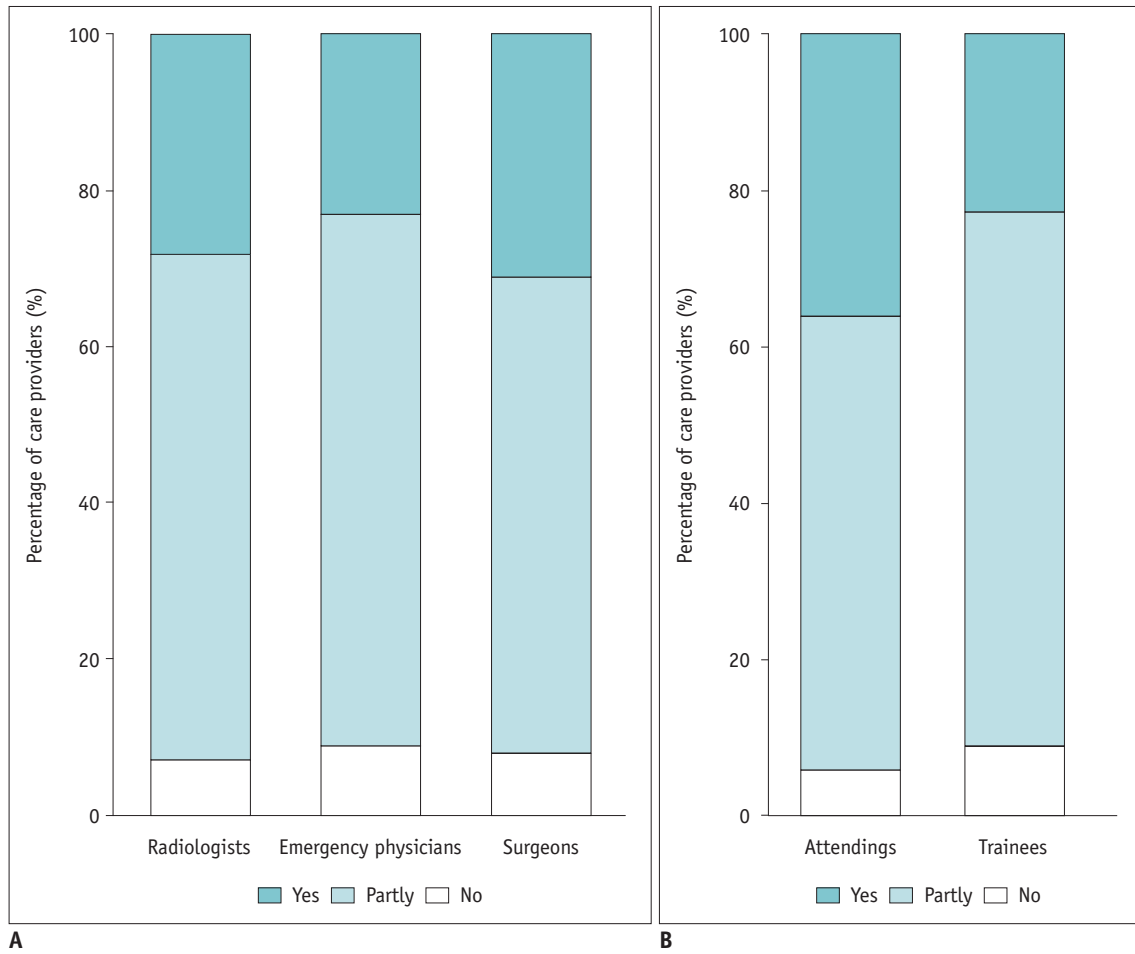

**Supplementary Fig. 1. Willingness to immediately change to 2-mSv CT (Q1), categorized by participants' department (A) and job title (B).** For responses, "yes" indicated 'completely and consistently' while "partly" indicated 'not consistently but selectively (e.g., during working hours).'
