# Supplementary material for: Using 2-mSv Appendiceal CT in Usual Practice for Adolescents and Young Adults: Willingness Survey of 579 Radiologists, Emergency Physicians, and Surgeons from 20 Hospitals
Source: PubMed Central journal article supplement — Korean J Radiol. 2019 Oct 30;21(1):68–76. doi: 10.3348/kjr.2019.0010 (PMC6960317; doi:10.3348/kjr.2019.0010), 2019-10-30
Supplement: kjr-21-68-s004.pdf [file kjr-21-68-s004.pdf]

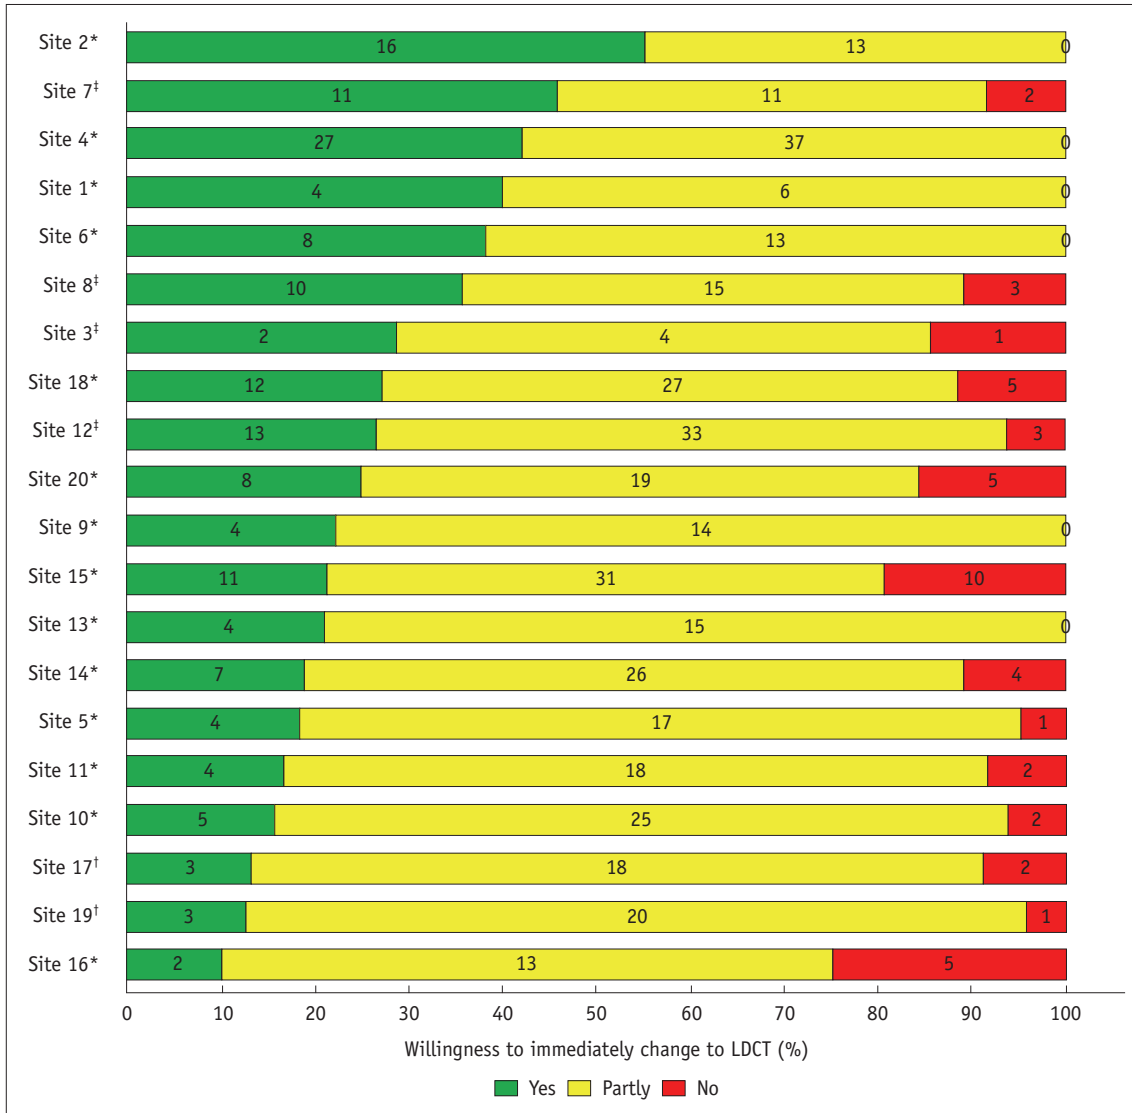

**Supplementary Fig. 2. Stacked bar graph shows per site survey responses for willingness to immediately change to 2-mSv CT (Q1).** Length of each stack indicates percentage of participants in category. Each number is that of participants included in stack. Nine months after completion of Low-dose CT for Appendicitis Trial patient recruitment, radiation dose for appendiceal CT in usual practice for adolescents and young adults was 2-mSv in 14 sites (denoted as \*), 4-mSv in two sites (denoted as <sup>†</sup>), and 5-mSv or higher in four sites (denoted as <sup>‡</sup>). For responses, “yes” indicated ‘completely and consistently’ while “partly” indicated ‘not consistently but selectively (e.g., during working hours)’. LDCT = low-dose CT
