# Supplementary material for: Using 2-mSv Appendiceal CT in Usual Practice for Adolescents and Young Adults: Willingness Survey of 579 Radiologists, Emergency Physicians, and Surgeons from 20 Hospitals
Source: PubMed Central journal article supplement — Korean J Radiol. 2019 Oct 30;21(1):68–76. doi: 10.3348/kjr.2019.0010 (PMC6960317; doi:10.3348/kjr.2019.0010), 2019-10-30
Supplement: kjr-21-68-s005.pdf [file kjr-21-68-s005.pdf]

**Supplementary Table 3. Multivariable Logistic Regression Analysis for Willingness to Immediately Change to 2-mSv CT**

| Covariates                                                                           | Willingness to Immediately Change to 2-mSv CT* | Univariable Analysis |          | Multivariable Analysis |          |
|--------------------------------------------------------------------------------------|------------------------------------------------|----------------------|----------|------------------------|----------|
|                                                                                      |                                                | Odds Ratio (95% CI)  | <i>P</i> | Odds Ratio (95% CI)    | <i>P</i> |
| <b>Participant characteristics</b>                                                   |                                                |                      |          |                        |          |
| <b>Department</b>                                                                    |                                                |                      |          |                        |          |
| Radiology                                                                            | 62/221 (28.1%)                                 | Reference            |          | Reference              |          |
| Emergency medicine                                                                   | 45/196 (23%)                                   | 0.8 (0.5–1.2)        | 0.24     | 0.7 (0.4–1.1)          | 0.130    |
| Surgery                                                                              | 51/162 (32%)                                   | 1.2 (0.8–1.8)        | 0.47     | 1.2 (0.7–1.9)          | 0.57     |
| <b>Job title</b>                                                                     |                                                |                      |          |                        |          |
| Attendings                                                                           | 73/203 (36.0%)                                 | 1.9 (1.3–2.8)        | 0.001    | 1.9 (1.2–2.9)          | 0.004    |
| Trainees                                                                             | 85/376 (22.6%)                                 | Reference            |          | Reference              |          |
| <b>Q4. Acceptance of 2-mSv CT<sup>†</sup></b>                                        |                                                |                      |          |                        |          |
| Yes                                                                                  | 150/396 (37.9%)                                | 13.3 (6.4–27.9)      | < 0.001  |                        |          |
| Partly or no <sup>‡</sup>                                                            | 8/183 (4%)                                     | Reference            |          |                        |          |
| <b>Q5. Maintaining dedicated appendix CT protocol in hospital information system</b> |                                                |                      |          |                        |          |
| Yes                                                                                  | 120/298 (40.3%)                                | 4.3 (2.9–6.5)        | < 0.001  | 4.2 (2.7–6.5)          | < 0.001  |
| Partly or no <sup>‡</sup>                                                            | 38/281 (13.5%)                                 | Reference            |          | Reference              |          |
| <b>Q6. Timeliness and accuracy of CT reports<sup>†</sup></b>                         |                                                |                      |          |                        |          |
| Yes                                                                                  | 137/471 (29.1%)                                | 1.7 (1.0–2.8)        | 0.044    |                        |          |
| Partly or no <sup>‡</sup>                                                            | 21/108 (19%)                                   | Reference            |          |                        |          |
| <b>Q7. Timeliness and accuracy of 2-mSv CT reports<sup>†</sup></b>                   |                                                |                      |          |                        |          |
| Yes                                                                                  | 136/468 (29.1%)                                | 1.7 (1.0–2.8)        | 0.051    |                        |          |
| Partly or no <sup>‡</sup>                                                            | 22/111(20%)                                    | Reference            |          |                        |          |
| <b>Q8. In comparison to natural background radiation</b>                             |                                                |                      |          |                        |          |
| 0.4-fold or less <sup>‡</sup>                                                        | 44/178 (25%)                                   | 0.7 (0.5–1.1)        | 0.145    | 0.8 (0.5–1.3)          | 0.40     |
| 4-fold                                                                               | 63/200 (31.5%)                                 | Reference            |          | Reference              |          |
| 40-fold or more <sup>‡</sup>                                                         | 51/201 (25.4%)                                 | 0.7 (0.5–1.1)        | 0.174    | 0.8 (0.5–1.3)          | 0.32     |
| <b>Q9. Evidence level of carcinogenic risk</b>                                       |                                                |                      |          |                        |          |
| Yes                                                                                  | 64/181 (35%)                                   | 1.8 (1.2–2.6)        | 0.003    | 1.6 (1.1–2.5)          | 0.028    |
| Partly or no <sup>‡</sup>                                                            | 94/398 (23.6%)                                 | Reference            |          | Reference              |          |
| <b>Hospital characteristics</b>                                                      |                                                |                      |          |                        |          |
| <b>Using iterative reconstruction</b>                                                |                                                |                      |          |                        |          |
| Yes                                                                                  | 78/268 (29.1%)                                 | 0.8 (0.6–1.2)        | 0.36     | 1.1 (0.7–1.7)          | 0.73     |
| No                                                                                   | 80/311 (25.7%)                                 | Reference            |          | Reference              |          |
| <b>Number of annual appendectomies</b>                                               |                                                |                      |          |                        |          |
| < 200                                                                                | 58/200 (29.0%)                                 | Reference            |          | Reference              |          |
| 200–399                                                                              | 55/183 (30%)                                   | 1.1 (0.7–1.6)        | 0.82     | 0.9 (0.5–1.6)          | 0.66     |
| ≥ 400                                                                                | 45/196 (23%)                                   | 0.7 (0.5–1.1)        | 0.171    | 0.7 (0.4–1.2)          | 0.195    |
| <b>Number of beds</b>                                                                |                                                |                      |          |                        |          |
| < 700                                                                                | 23/99 (23%)                                    | Reference            |          | Reference              |          |
| 700–999                                                                              | 43/190 (23%)                                   | 1.0 (0.5–1.7)        | 0.91     | 1.4 (0.7–2.9)          | 0.37     |
| ≥ 1000                                                                               | 92/290 (31.7%)                                 | 1.5 (0.9–2.6)        | 0.111    | 2.0 (1.1–3.9)          | 0.031    |
| <b>Number of enrolled patients in LOCAT</b>                                          |                                                |                      |          |                        |          |
| < 100                                                                                | 74/263 (28.1%)                                 | Reference            |          | Reference              |          |
| ≥ 100                                                                                | 84/316 (26.6%)                                 | 0.9 (0.6–1.3)        | 0.68     | 0.9 (0.5–1.4)          | 0.55     |

For questions regarding willingness or acceptance, “yes” indicated ‘completely and consistently’ while “partly” indicated ‘not consistently but selectively (e.g., during working hours).’ \*Data are numbers of participants who responded as “yes” to Q1 out of all participants in category (and percentages), †Not included in multivariable analysis, ‡Categories with small numbers of patients (< 50) were merged into nearby categories. CI = confidence interval, LOCAT = Low-d0se CT for Appendicitis Trial
